# Supplementary material for: Closing the gap for efficient immobilization of biocatalysts in continuous processes: HaloTag™ fusion enzymes for a continuous enzymatic cascade towards a vicinal chiral diol
Source: Royal Society of Chemistry journal article supplement (doi:10.1039/c7gc03225k), 2017-12-22
Supplement: c7gc03225k1.pdf [file c7gc03225k1.pdf]

## Electronic Supplementary

### Table of contents

- I Primer Sequences
- II DNA sequences encoding for the corresponding fusion enzymes
- III Protein sequences
- IV Effect of acetaldehyde on production of (*S,S*)-PPD
- V Photograph of flow setup

### I Primer Sequences

Primer A: tttaagaaggagatatcatATGAAACATCACCATCACCATCACGCAGAAATTGGTACG

Primer B: ttattcagcagacgataCGCGGCCGCTTTCGCCGC

Primer C: cagcggcgaaagcggccgcgATGTCTAACCGTTTGGATG

Primer D: gctttgtagcagccgatcCTATTGAGCAGTGTAGCC

Primer E: cagcggcgaaagcggccgcgATGGCTTCGGTACACGGCACCCAC

Primer F: gctttgtagcagccgatcTTAAGATCTCTTCACCGGGCTTAC

Primer G: GATCCGGCTGCTAACAAAG

Primer H: CGCGGCCGCTTTCGCCGC

## II DNA sequences encoding for the corresponding fusion enzymes

- red sequences encode for the HaloTag
- green sequences encode for the helical linker
- black sequences encode for the corresponding enzyme

### II.I *halotag-ppbfd* L476Q

ATGAAACATCACCATCACCATCACGCAGAAATTGGTACGGGATTTCGGTTTGACCCGCATTATGTGGAGGTTCTGG  
GTGAACGCATGCACTACGTGGATGTTGGTCCGCGCGATGGCACACCGGTGCTGTTTCTGCATGGTAATCCGACCTC  
CAGCTATGTTTGGCGCAACATTATTCCGCATGTCGCCCCAACGCATCGCTGTATTGCCCCAGATCTCATTGGCATGG  
GCAAAAGCGACAAACCGGATTGTTGGGCTACTTCTTCGACGATCACGTACGGTTTATGGACGCCTTTATCGAGGCTCT  
GGGACTCGAGGAAGTAGTGCTGGTTATTCATGACTGGGGCTCTGCATTAGGCTTTCACTGGGCTAAACGGAACCC  
AGAACCGCTCAAGGGGATTGCCTTCATGGAGTTCATCCGTCCGATTCCGACCTGGGATGAATGGCCCGAATTTGCC  
CGTGAAACCTTTCAGGCGTTTCGTACCACGGATGTTGGCCGTAAGCTCATCATCGACCAAAACGTGTTTCATTGAGG  
GCACTCTTCCCATGGGAGTAGTGCGTCCTTTAACCGAAGTCGAGATGGACCACTATCGCGAACCTTCCTGAATCC  
GGTTGATCGCGAACCGCTGTGGCGCTTCCCGAATGAGCTGCCTATTGCTGGTGAACCGGCGCAATATCGTGGCACTT  
GTGGAAGAATACATGGATTGGCTGCATCAGAGTCCAGTCCCTAAGCTGTTGTTTTGGGGTACACCTGGCGTGTTGA  
TTCCGCCTGCAGAAGCTGCTCGCTTAGCGAAAAGCTTGCCCAACTGCAAAGCGGTCGATATTGGGCCAGGTCTGAA  
CCTGTTACAGGAGGATAACCCGGATCTGATCGGGAGTGAAATCGCGCGTTGGCTGTCAACTCTGGAAATCTCGGG  
TCTTGCAGAAGCAGCGGCCAAAGAAGCTGCGGCCAAAGAGGCAGCCGCGAAAGAAGCAGCGGCCGAAAGCGGCC  
GCGATGGCTTCGGTACACGGCACCATACGAACTCTTGCGACGTCAAGGCATCGATACGGTCTTCGGCAATCCTG  
GCTCGAACGAGCTCCCGTTTTTGAAGGACTTTCAGAGGACTTTCGATACATCCTGGCTTTCAGGAAGCGTGTGT  
GGTGGGCATTGCAGACGGCTATGCGCAAGCCAGTCGGAAGCCGGCTTTCATTAACCTGCATTCTGCTGCTGGTACC  
GGCAATGCTATGGGTGCACTCAGTAACGCCTGGAACCTCACATTCCCCGCTGATCGTCACTGCCGGCCAGCAGACCA  
GGGCGATGATTGGCGTTGAAGCTCTGCTGACCAACGTCGATGCCGCCAACCTGCCACGACCACTTGTCAAATGGAG  
CTACGAGCCCGCAAGCGCAGCAGAAGTCCCTCATGCGATGAGCAGGGCTATCCATATGGCAAGCATGGCGCCACA  
AGGCCCTGTCTATCTTTCGGTGCCATATGACGATTGGGATAAGGATGCTGATCCTCAGTCCCACCACCTTTTTGATC  
GCCATGTCAGTTCATCAGTACGCCTGAACGACCAGGATCTCGATATTCTGGTGAAAGCTCTCAACAGCGCATCCAA  
CCCGGCGATCGTCTGGGCCCCGACGTCGACGCGAGCAAATGCGAACGCGAGACTGCGTCATGTTGGCCGAACGCCT  
CAAAGCTCCGTTTTGGGTTGCGCCATCCGCTCCACGCTGCCATTCCCTACCCGTCATCCTTGCTTCCGTGGATTGAT  
GCCAGCTGGCATCGCAGCGATTCTCAGCTGCTCGAAGGTCACGATGTGGTTTTGGTAATCGGCGCTCCAGTGTTCC  
CGTTACCACCAATACGACCCAGGTCAATATCTCAAACCTGGCACGCGATTGATTTCGGTGACCTGCGACCCGCTCGA

AGCTGCACGCGCGCCAATGGGCGATGCGATCGTGGCAGACATTGGTGCGATGGCTAGCGCTCTTGCCAACTTGGT  
TGAAGAGAGCAGCCGCCAGCTCCAACTGCAGCTCCGGAACCCGCGAAGGTTGACCAAGACGCTGGCCGACTTCA  
CCCAGAGACAGTGTTTCGACACACTGAACGACATGGCCCCGGAGAATGCGATTTACCTGAACGAGTCGACTTCAAC  
GACCGCCCAAATGTGGCAGCGCCTGAACATGCGCAACCCTGGTAGCTACTACTTCTGTGCAGCTGGCGGACTGGG  
CTTCGCCCTGCCTGCAGCAATTGGCGTTCAACTCGCAGAACCCGAGCGACAAGTCATCGCCGTCATTGGCGACGGA  
TCGGCGAACTACAGCATTAGTGCGTTGTGGACTGCAGCTCAGTACAACATCCCCACTATCTTCGTGATCATGAACAA  
CGGCACCTACGGTGCGTTGCGATGGTTTGCCGGCGTTCTCGAAGCAGAAAACGTTCTGGGCAGGATGTGCCAGG  
GATCGACTTCCGCGCACTCGCCAAGGGCTATGGTGTCCAAGCGCTGAAAGCCGACAACCTTGAGCAGCTCAAGGG  
TTCGCTACAAGAAGCGCTTTCTGCCAAAGGCCCGGTACTTATCGAAGTAAGCACCGTAAGCCCGGTGAAGAGATCT  
TAA

## II.II *halotag-lbadh*

ATGAAACATCACCATCACCATCACGCAGAAATTGGTACGGGATTTCCGTTTGACCCGCATTATGTGGAGGTTCTGG  
GTGAACGCATGCACTACGTGGATGTTGGTCCGCGCGATGGCACACCGGTGCTGTTTCTGCATGGTAATCCGACCTC  
CAGCTATGTTTGGCGCAACATTATTCGCATGTCGCCCCAACGCATCGCTGTATTGCCCCAGATCTCATTGGCATGG  
GCAAAAGCGACAAACCGGATTTGGGCTACTTCTTCGACGATCACGTACGGTTTATGGACGCCTTTATCGAGGCTCT  
GGGACTCGAGGAAGTAGTGCTGGTTATTCATGACTGGGGCTCTGCATTAGGCTTTCACTGGGCTAAACGGAACCC  
AGAACCGTCAAGGGGATTGCCTTCATGGAGTTCATCCGTCCGATTCCGACCTGGGATGAATGGCCGAATTTGCC  
CGTGAAACCTTTCAGGCGTTTCGTACCACGGATGTTGGCCGTAAGCTCATCATCGACCAAAACGTGTTTCATTGAGG  
GCACTCTTCCCATGGGAGTAGTGCTCCTTTAACCGAAGTCGAGATGGACCACTATCGCGAACCCCTTCTGAATCC  
GGTTGATCGCGAACCGCTGTGGCGCTTCCCGAATGAGCTGCCTATTGCTGGTGAACCGGCGCAATATCGTGGCACTT  
GTGGAAGAATACATGGATTGGCTGCATCAGAGTCCAGTCCCTAAGCTGTTGTTTTGGGGTACACCTGGCGTGTTGA  
TTCCGCCTGCAGAAGCTGCTCGCTTAGCGAAAAGCTTGCCCACTGCAAAGCGGTCGATATTGGGCCAGGTCTGAA  
CCTGTTACAGGAGGATAACCCGGATCTGATCGGGAGTGAAATCGCGCGTTGGCTGTCAACTCTGGAAATCTCGGG  
TCTTGCAGAAGCAGCGGCCAAAGAAGCTGCGGCCAAAGAGGCAGCCGCGAAAGAAGCAGCGGCGAAAGCGGCC  
GCGATGTCTAACCGTTTGGATGGTAAGGTAGCAATCATTACAGGTGGTACGTTGGGTATCGGTTTAGCTATCGCCA  
CGAAGTTCGTTGAAGAAGGGGCTAAGGTCATGATTACCGGCCGGCACAGCGATGTTGGTGAAAAAGCAGCTAAG  
AGTGTCGGCACTCCTGATCAGATTCAATTTTTCCAACATGATTCTCCGATGAAGACGGCTGGACGAAATTATTGAA  
TGCAACGGAAAAAGCCTTTGGCCAGTTTCTACATTAGTTAATAACGCTGGGATCGCGGTTAACAAGAGTGTGAA  
GAAACCACGACTGCTGAATGGCGTAAATTATTAGCCGTCAACCTTGATGGTGTCTTCTTCGGTACCCGATTAGGGA  
TTCAACGGATGAAGAACAAAGGCTTAGGGGCTTCCATCATCAACATGTCTTCGATCGAAGGCTTTGTGGGTGATCC

TAGCTTAGGGGCTTACAACGCATCTAAAGGGGCCGTACGGATTATGTCCAAGTCAGCTGCCTTAGATTGTGCCCTA  
AAGGACTACGATGTTTCGGGTAAACACTGTTACCCCTGGCTACATCAAGACACCATTGGTTGATGACCTACCAGGGG  
CCGAAGAAGCGATGTCACAACGGACCAAGACGCCAATGGGCCATATCGGTGAACCTAACGATATTGCCTACATCT  
GTGTTTACTTGGCTTCTAACGAATCTAAATTTGCAACGGGTTCTGAATTCGTAGTTGACGGTGGCTACACTGCTCAA  
TAG

### III. Protein sequences

- **red** sequences: sequence of the HaloTag
- **green** sequences: sequence of the helical linker
- black sequences: sequence of the corresponding enzyme

#### III.I HaloTag-*Pp*BFD L476Q

MKHHHHHHAEIGTGFPDPHYVEVLGERMHYVDVGPRDGPVFLHGNPTSSYVWRNIIPHVAPTHRCIAPDLIGMG  
KSDKPDLGYFFDDHVRFMDAFIEALGLEEVVLVIHDWGSALGFHWAKRNPVVKGIAMFIRPIPTWDEWPEFARETF  
QAFRTTDVGRKLIIDQNVFIEGTLPMGVVRPLTEVEMDHYREPFLNPVDREPLWRFPNELPIAGEPANIVALVEEYMDW  
LHQSPVPKLLFWGTPGVLIPPAEARLAKSLPNCKAVDIGPGLNLLQEDNPDIGSEIARWLSTLEISGLAEAAAKEAAAK  
EAAAKEAAAKAAMASVHGTTYELLRRQGIDTVFGNPGSNELPFLKDFPEDFRYILALQEACVVGIADGYAQASRKPAFI  
NLHSAAGTGNAMGALSNAWNSHSLIVTAGQQTRAMIGVEALLTNVDAANLPRPLVKWSYEPASAAEVPHAMSRAI  
HMASMAPQGPVYLSVPYDDWDKDADPQSHHLFDRHVSSSVRLNDQDLILVKALNSASNPAIVLGPDVDAANANAD  
CVMLAERLKAPVWVAPSAPRCFPTRHPCFRGLMPAGIAAISQLEGHDDVVLVIGAPVFRYHQYDPGQYLKPGTRLISV  
TCDPLEAARAPMGDAIVADIGAMASALANLVEESSRQLPTAAPEPAKVDQDAGRLHPETVFDTLNDMAPENAIYLNES  
TSTTAQMWQRLNMRNPGSYFCAAGGLGFALPAAIGVQLAEPERQVIAVIGDGSANYSISALWTAAQYNIPTIFVIMN  
NGTYGALRWFAGVLEAENVPGQDVPBGIDFRALAKGYGVQALKADNLEQLKGSQLEALSAGKGPVLEIVSTVSPVKRS

#### III.II HaloTag-*Lb*ADH

MKHHHHHHAEIGTGFPDPHYVEVLGERMHYVDVGPRDGPVFLHGNPTSSYVWRNIIPHVAPTHRCIAPDLIGMG  
KSDKPDLGYFFDDHVRFMDAFIEALGLEEVVLVIHDWGSALGFHWAKRNPVVKGIAMFIRPIPTWDEWPEFARETF  
QAFRTTDVGRKLIIDQNVFIEGTLPMGVVRPLTEVEMDHYREPFLNPVDREPLWRFPNELPIAGEPANIVALVEEYMDW  
LHQSPVPKLLFWGTPGVLIPPAEARLAKSLPNCKAVDIGPGLNLLQEDNPDIGSEIARWLSTLEISGLAEAAAKEAAAK

EAAAKEAAKAAAMSNRLDGKVAIITGGTLGIGLAIATKFVEEGAKVMITGRHSDVGEKAAKSVGTPDQIQFFQHDSSD  
EDGWTKLFDATEKAFGPVSTLVNNAAGIANKSVEETTTAEWRKLLAVNLDGVFFGTRLGIQRMKNKGLGASIIINMSSIE  
GFVGDPSTLGAYNASKGAVRIMSKSAALDCALKDYDVRVNTVHPGYIKTPLVDDLPGAEAEAMSQRKTTPMGHIGEPNDI  
AYICVYLASNESKFATGSEFVVDGGYTAQ

#### IV Effect of acetaldehyde on the production of (S,S)-PPD

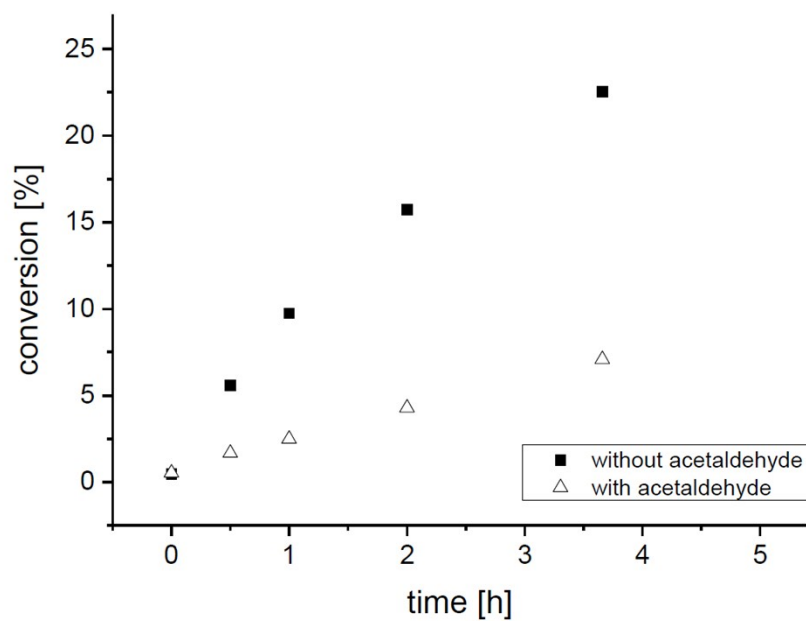

**Figure S1: Production of (S,S)-PPD catalyzed by HaloTag-LbADH in the presence of acetaldehyde.** The reduction of (S)-HPP towards (S,S)-PPD was analyzed in batch using immobilized HaloTag-LbADH. (S)-HPP resulting from the carboligation of benzoylformate and acetaldehyde was used either without removal of residual acetaldehyde or after removal by membrane supported stripping. Assay: 20 mM (S)-HPP containing either 40 mM or no acetaldehyde, 10 % (v/v) isopropanol, 0.5 mM NAPH, 50 mM TEA, 0.15 mM ThDP, 2.5 mM MgSO<sub>4</sub>, V = 1 ml, 25 °C, 1200 rpm.

## V Photograph of flow setup

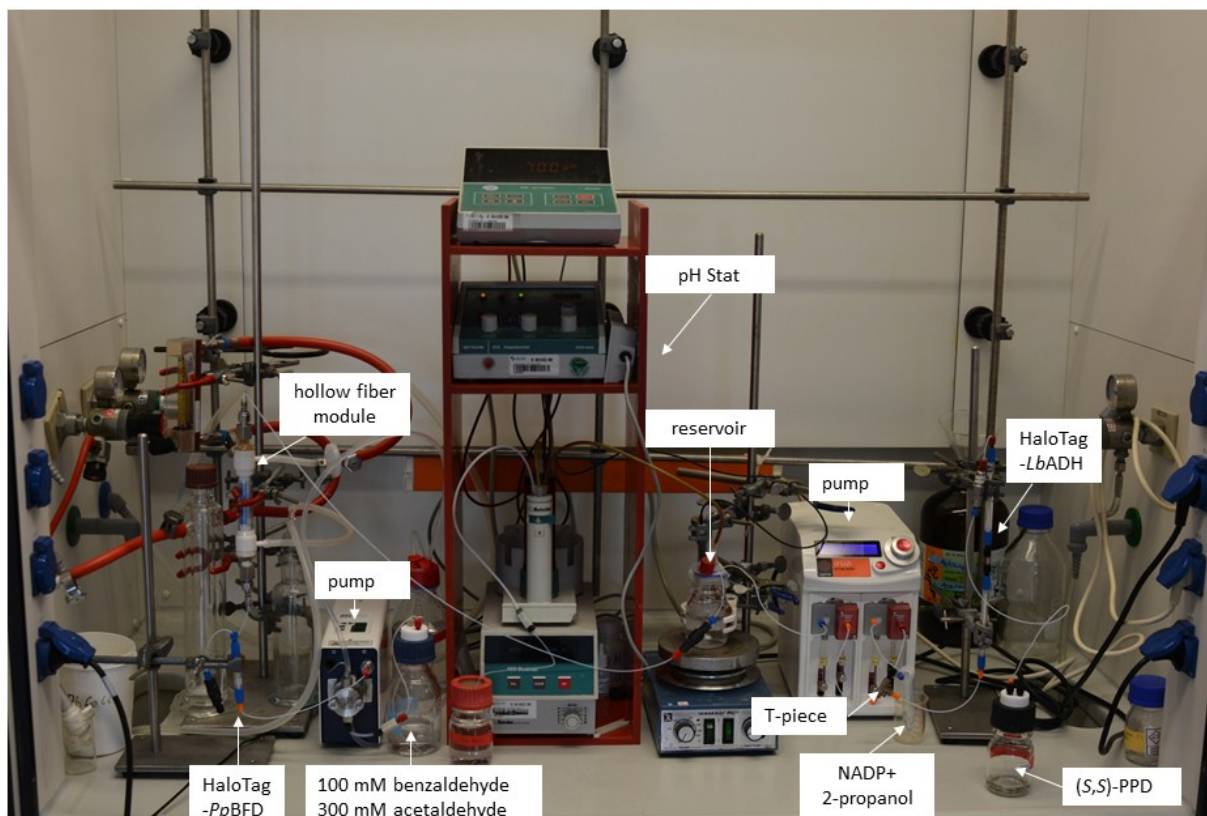

**Figure S2: Enzymatic 2-step cascade for the continuous production of (S,S)-PPD.** In the first step catalyzed by immobilized HaloTag-PpBFD L476Q, benzoylformate is decarboxylated towards benzaldehyde and carbon dioxide. The resulting benzaldehyde is then further converted into (S)-HPP by a carboligation in the presence of excess acetaldehyde. Afterwards, residual acetaldehyde is removed by membrane supported stripping using a hollow fiber module and the pH is automatically adjusted to pH 7.0 with a pH-Stat. In the second step catalyzed by immobilized HaloTag-LbADH, (S)-HPP is reduced to (S,S)-PPD under consumption of NADPH, which is produced from the cheaper oxidized cofactor NADP+ using 10 vol% 2-propanol as a cosubstrate for cofactor regeneration.
